# Supplementary material for: Graphene quantum dot incorporated perovskite films: passivating grain boundaries and facilitating electron extraction
Source: Royal Society of Chemistry journal article supplement (doi:10.1039/c6cp06953c), 2017-01-01
Supplement: c6cp06953c1.pdf [file c6cp06953c1.pdf]

*Electronic Supplementary Information for*

**Graphene quantum dot incorporated perovskite films:  
passivating grain boundaries and facilitating electron  
extraction**

Xiang Fang <sup>a</sup>, Jianning ding <sup>a, b\*</sup>, Ningyi Yuan <sup>a\*</sup>, Peng Sun <sup>a</sup>, Minghang Lv <sup>a</sup>, Guqiao  
Ding <sup>c</sup>, Chong Zhu <sup>a, c</sup>

*<sup>a</sup> School of Materials Science and Engineering, Jiangsu Collaborative Innovation Center of  
Photovoltaic Science and Engineering, Jiangsu Province Cultivation base for State Key  
Laboratory of Photovoltaic Science and Technology, Changzhou University, Changzhou,  
213164, Jiangsu, China*

*<sup>b</sup> Micro/Nano Science and Technology Center, Jiangsu University, Zhenjiang, 212013, China*

*<sup>c</sup> State Key Laboratory of Functional Materials for Informatics, Shanghai Institute of  
Microsystem and Information Technology, Chinese Academy of Science, Shanghai, 200500,  
China.*

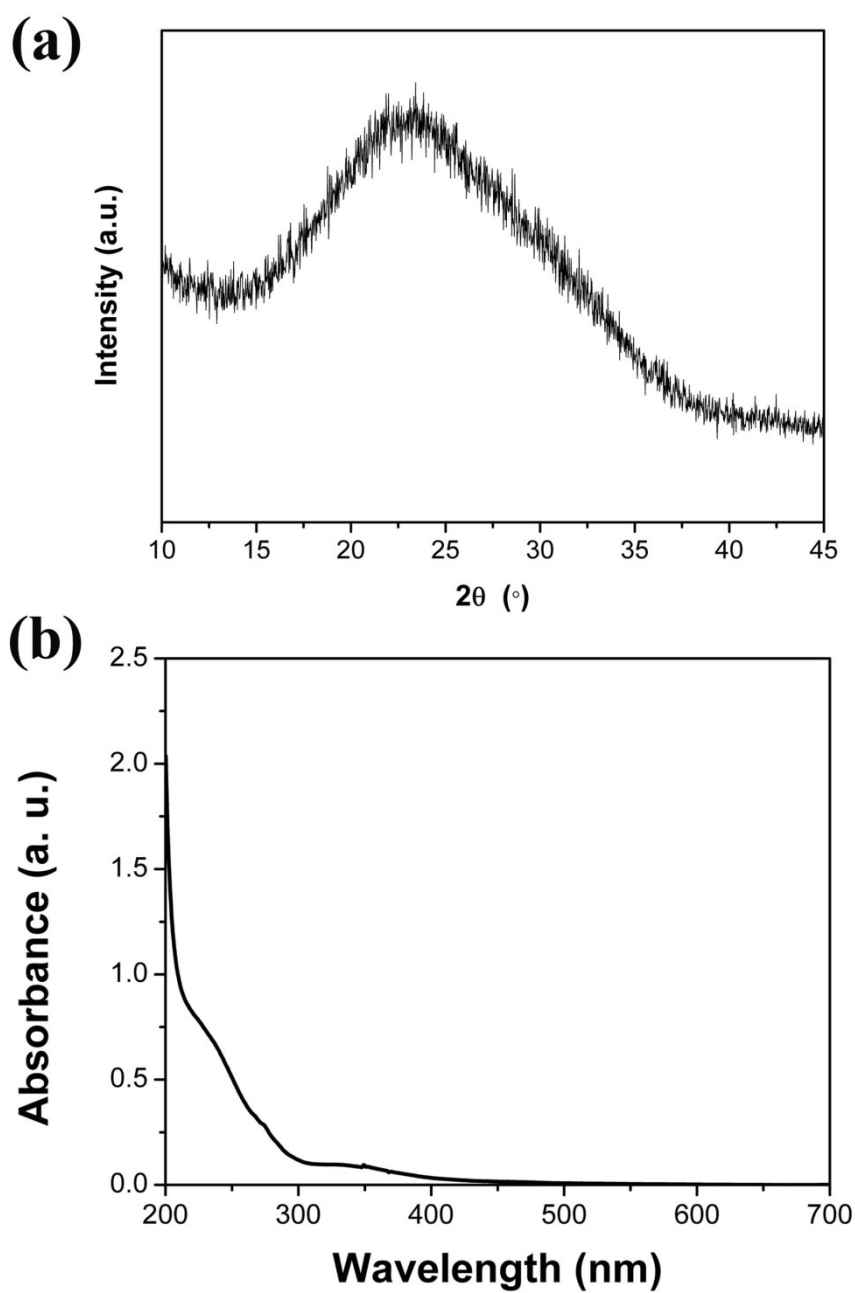

Fig. S1 (a) XRD and (b) UV-vis absorption spectrum of GQDs.

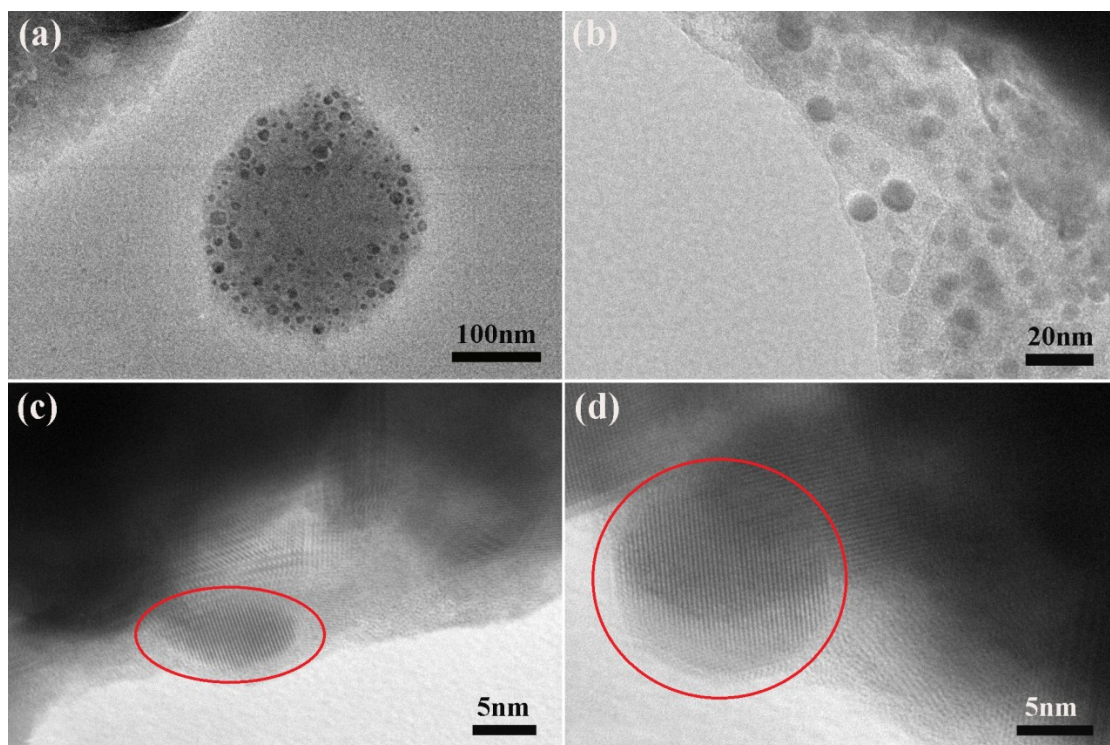

Fig. S2 TEM images of GQD-perovskite with different resolutions.

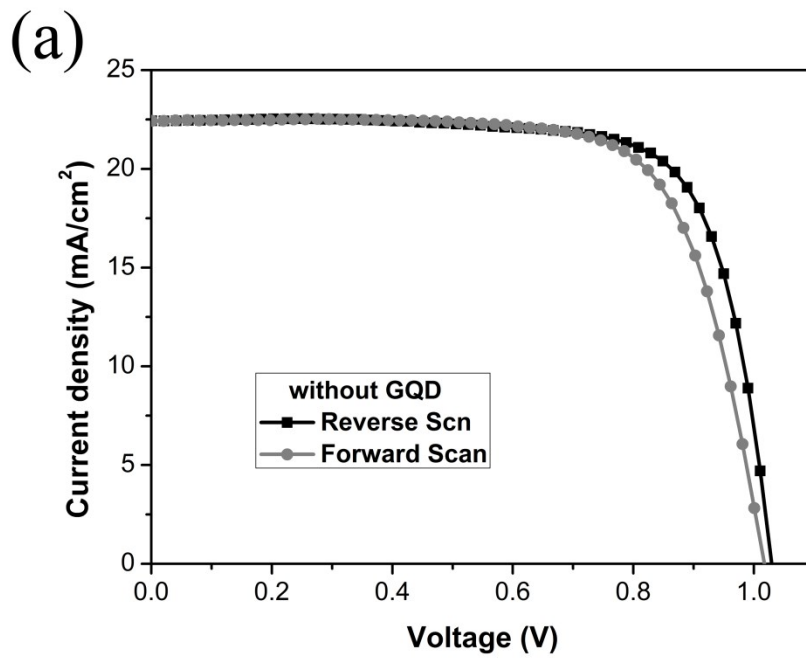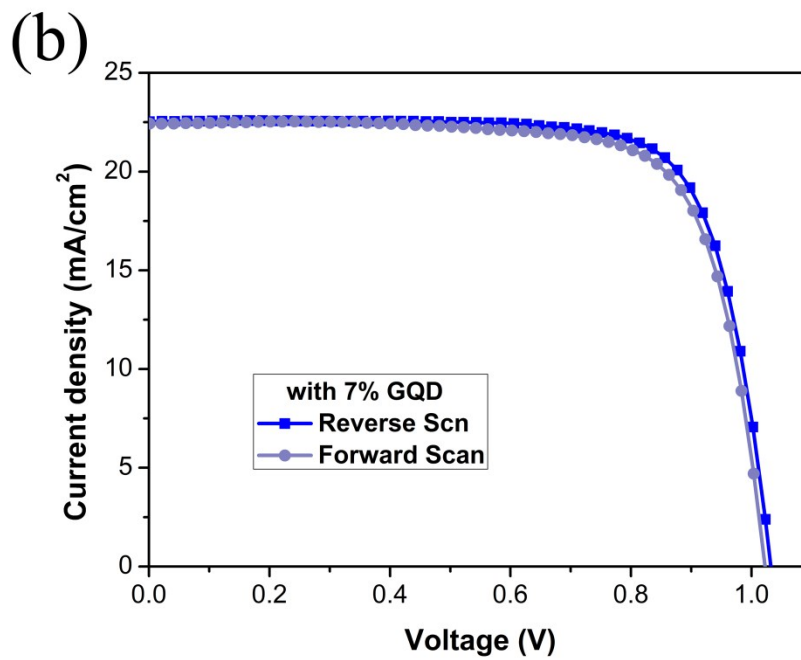

Fig.S3 J-V characteristics of perovskite solar cells (a) without GQD and (b) with 7% GQD including reverse and forward scan.

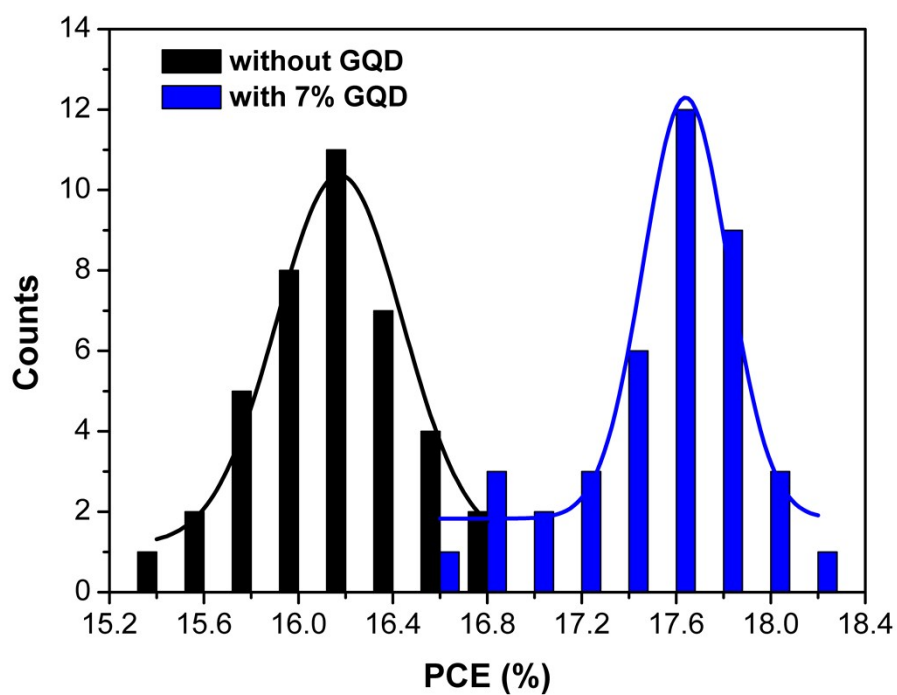

Fig.S4 The PCE distribution histogram of the perovskite solar cells without and with 7% GQD

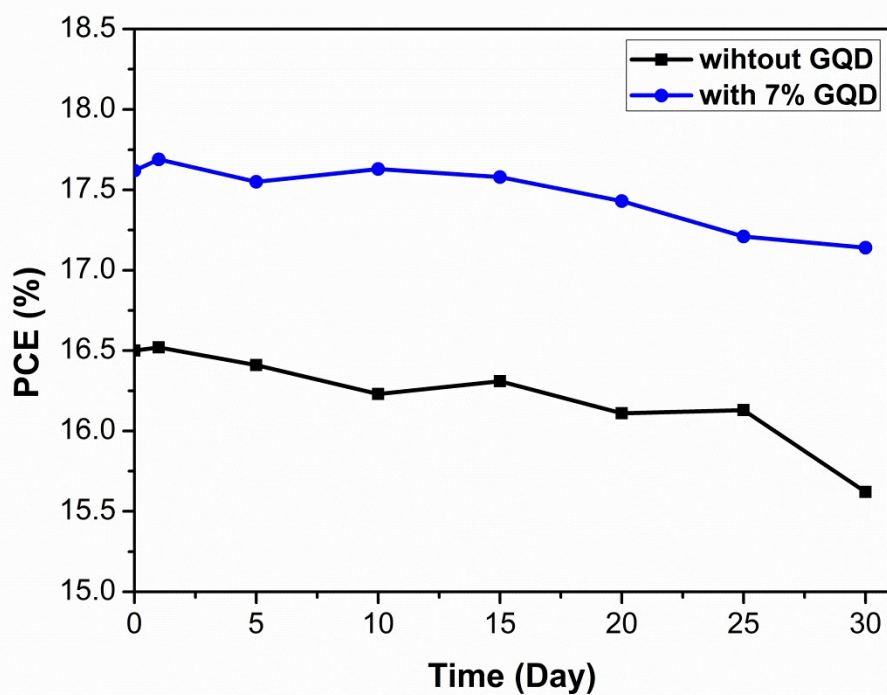

Fig.S5 The humidity stability of fabricated perovskite solar cells (with humidity of 36%)

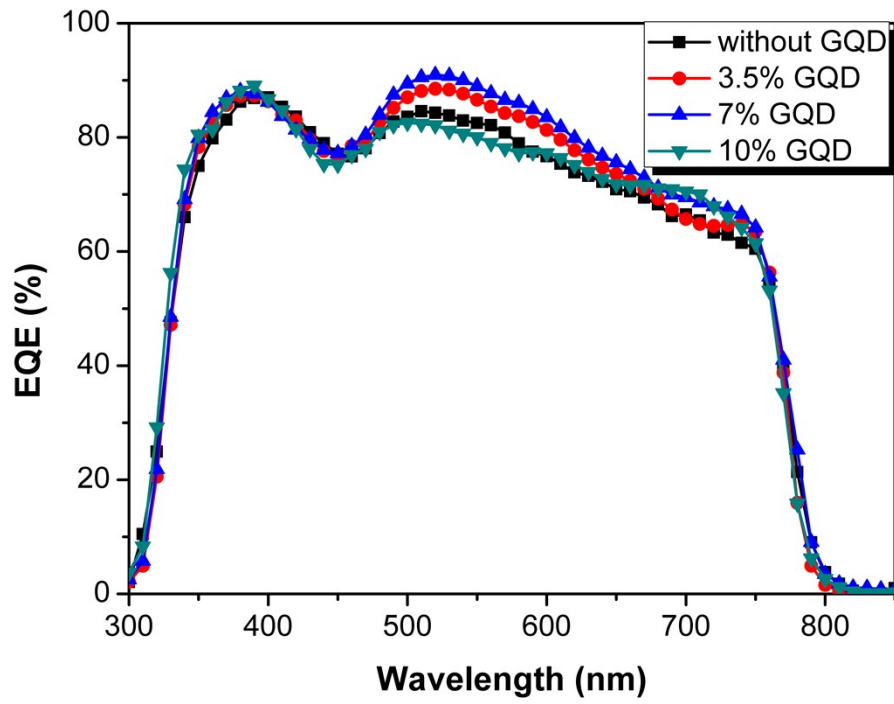

Fig. S6 The EQE spectra of fabricated perovskite solar cells with different amount of GQDs.

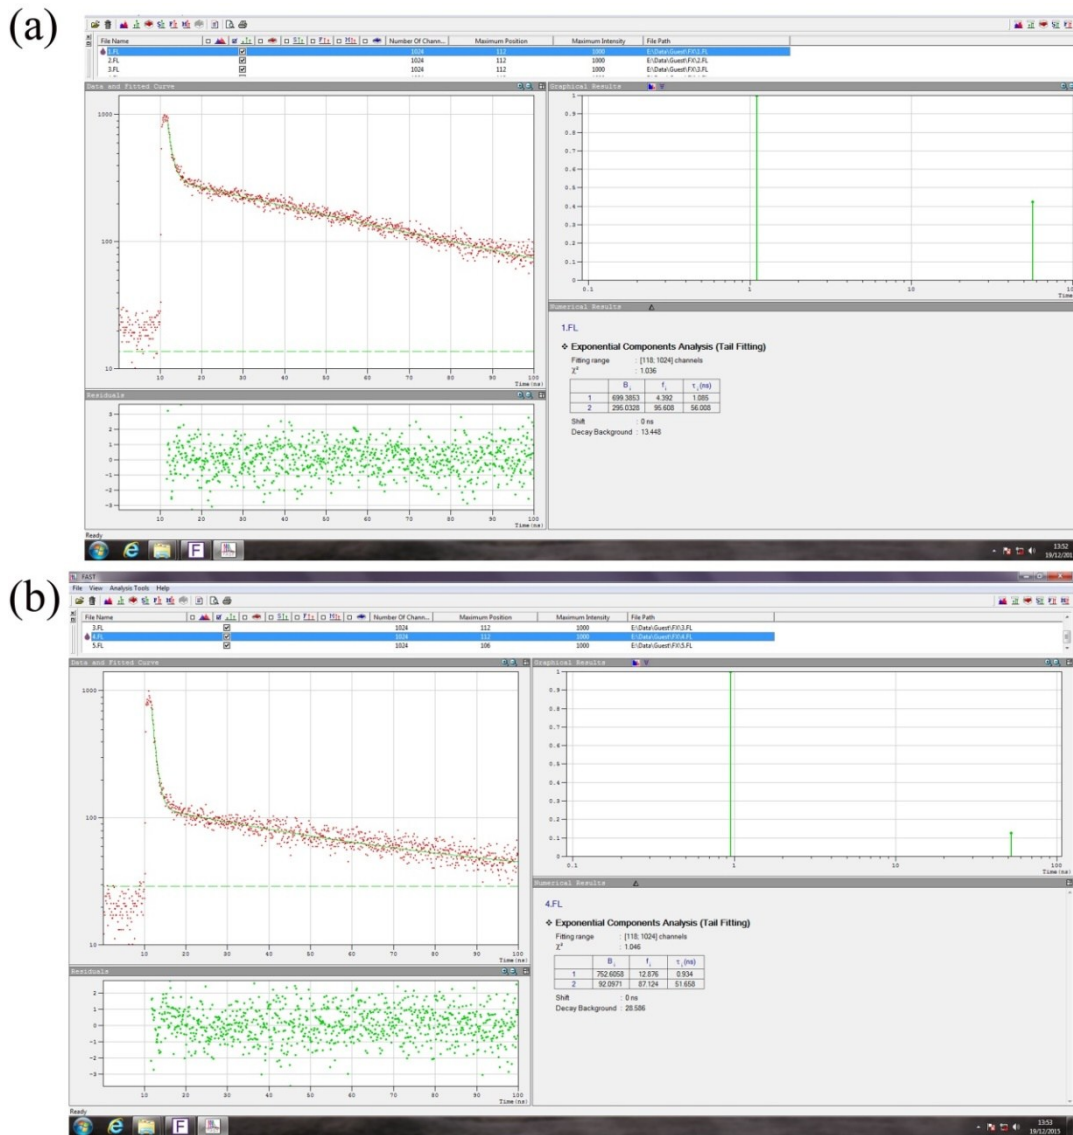

Fig.S7 Original fitting graphs of the TRPL decay measurement of perovskite solar cells (a) without GQD and (b) with 7% GQD
